# Supplementary material
Source: Research Square preprint supplement (doi:10.21203/rs.3.rs-10253584/v1)
Supplement: Supplementary file 1 [file 2c74d6e0b74f239ff64d8302.docx]

**Supplementary Information**

Lumbar Vacuum Phenotypes in Degenerative Spondylolisthesis: Distinct Instability Signatures of Intradiscal and Facet Joint Gas

Xianyi Zhang, QiRui Zhu, Tianci Fang, Jie Shang, Lei Liu, Guizhu Ji, Ziwei Xia, Youdi Xue, Hengcai Zhou, Meng Han, Chao Ma

**Supplementary Fig. S1. Disc and facet structural degeneration across VP phenotypes.**


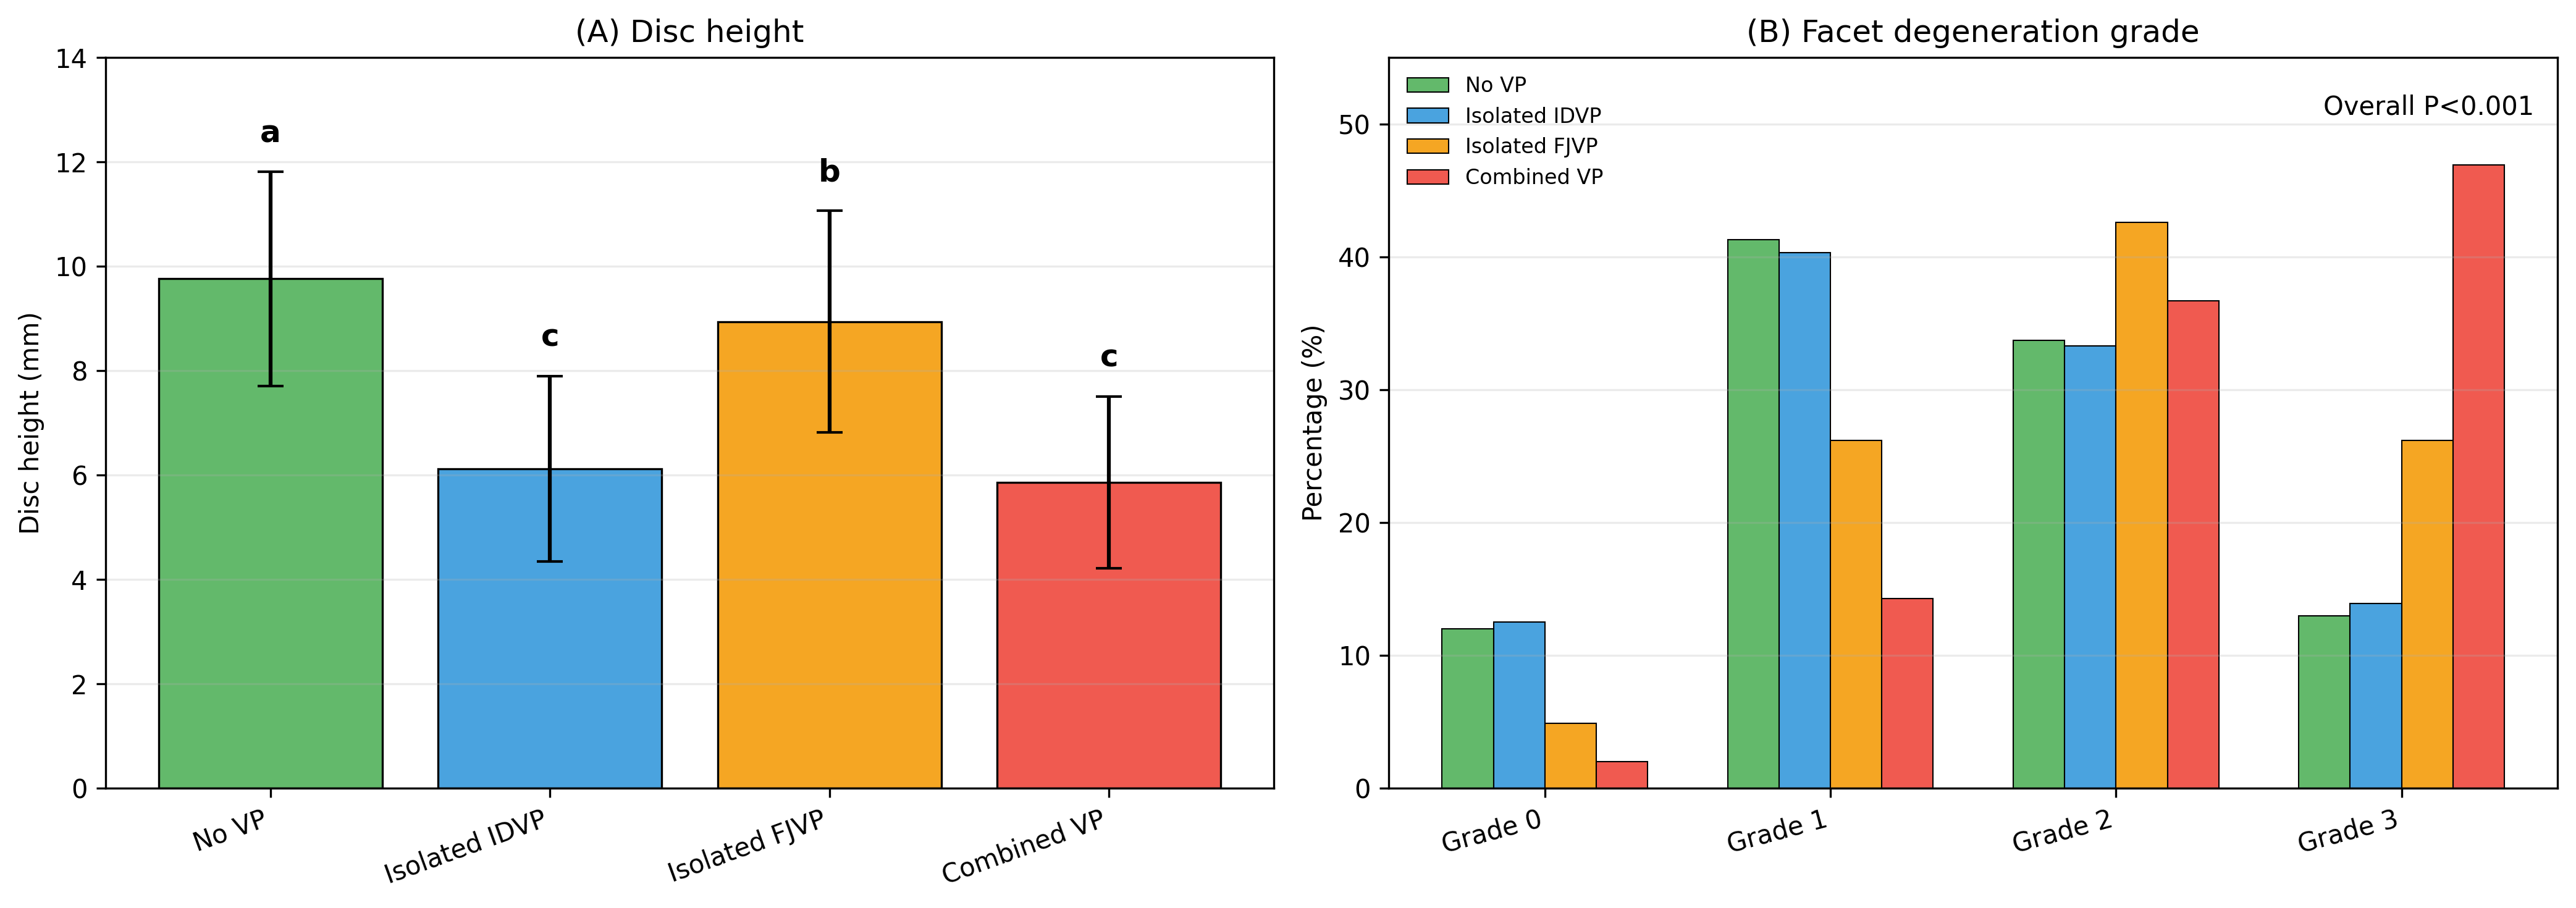


(A) Disc height comparison among four VP phenotypes. Bars sharing the same letter are not significantly different after adjustment for multiple comparisons (adjusted P>0.05). (B) Facet degeneration grade distribution among four VP phenotypes. Error bars represent standard deviations. Between-group comparisons were performed using one-way ANOVA or chi-square tests, with Tukey/Bonferroni adjustment for pairwise comparisons where appropriate.

**Supplementary Fig. S2. Dynamic stabilizer and posterior element changes across VP phenotypes.**


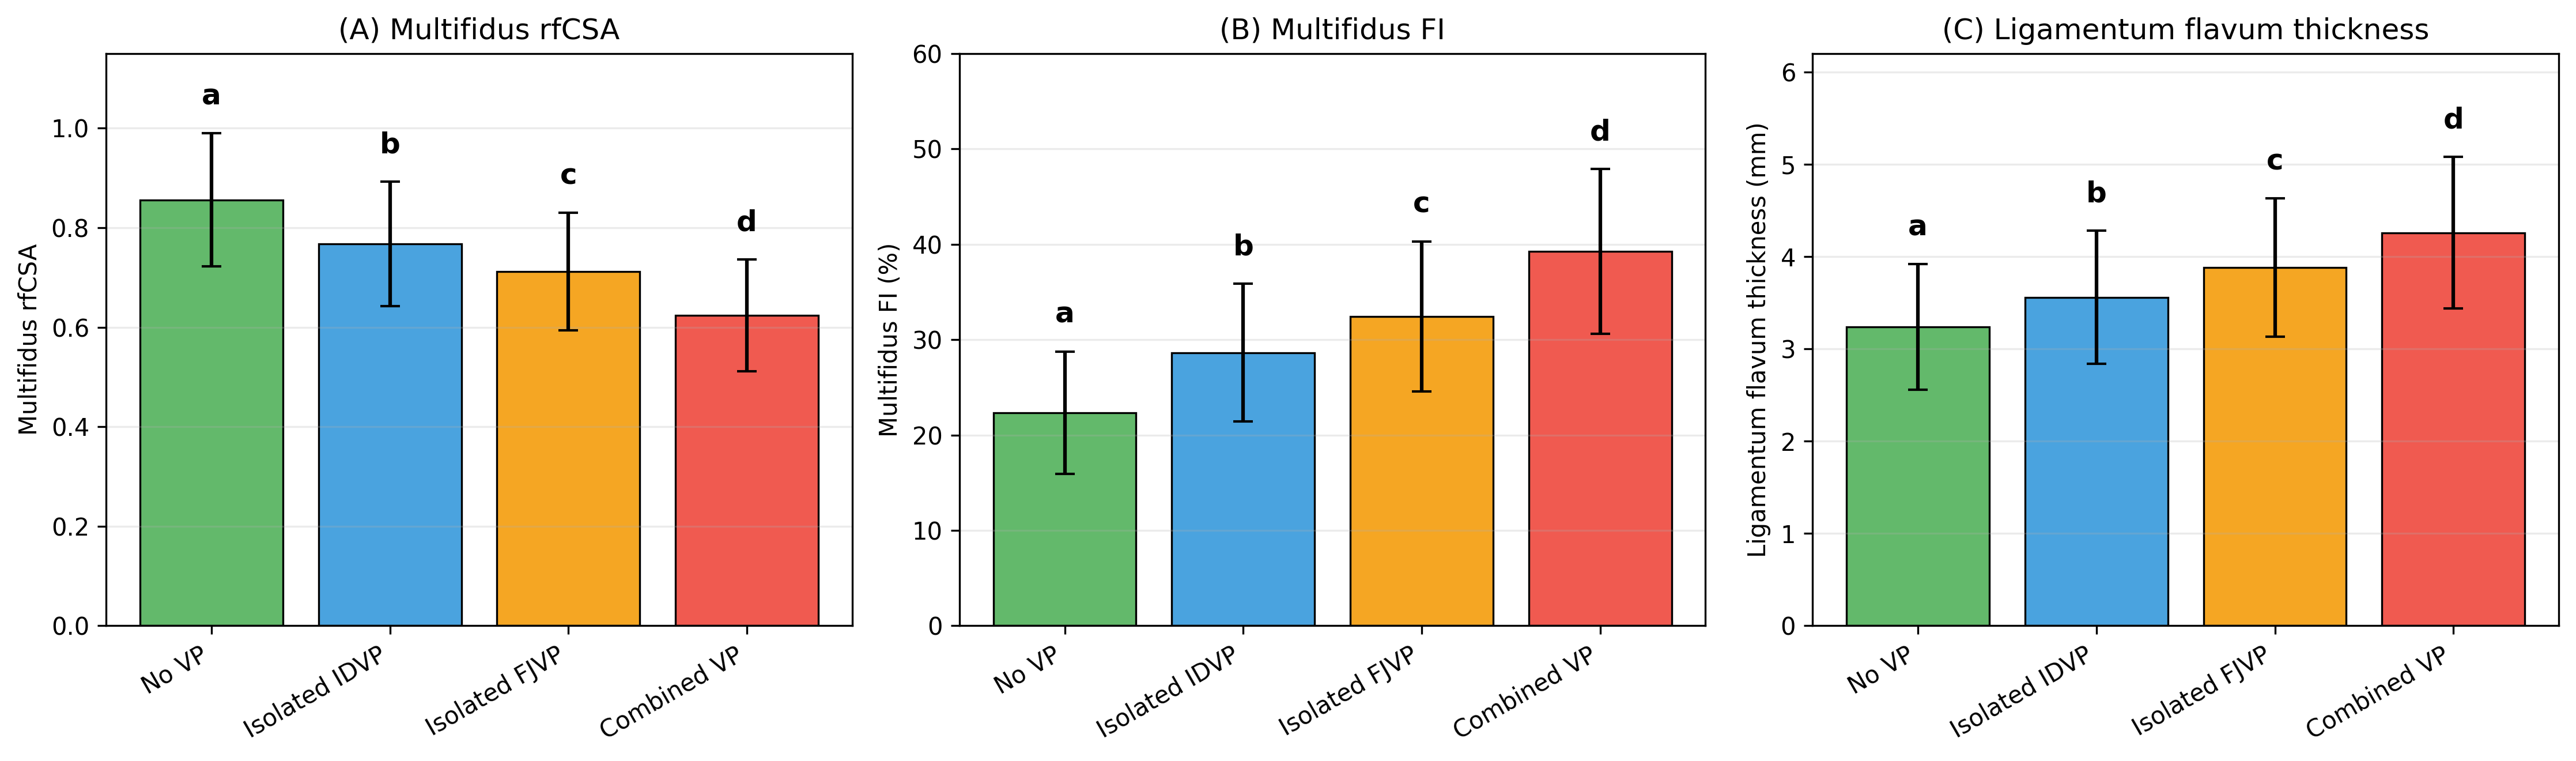


(A) Multifidus relative functional cross-sectional area (rfCSA) comparison. (B) Multifidus fatty infiltration (FI) comparison. (C) Ligamentum flavum thickness comparison. Error bars represent standard deviations. Bars sharing the same letter are not significantly different after Tukey/Bonferroni post hoc adjustment (adjusted P>0.05).

**Supplementary Fig. S3. Radiographic instability parameters across VP phenotypes.**


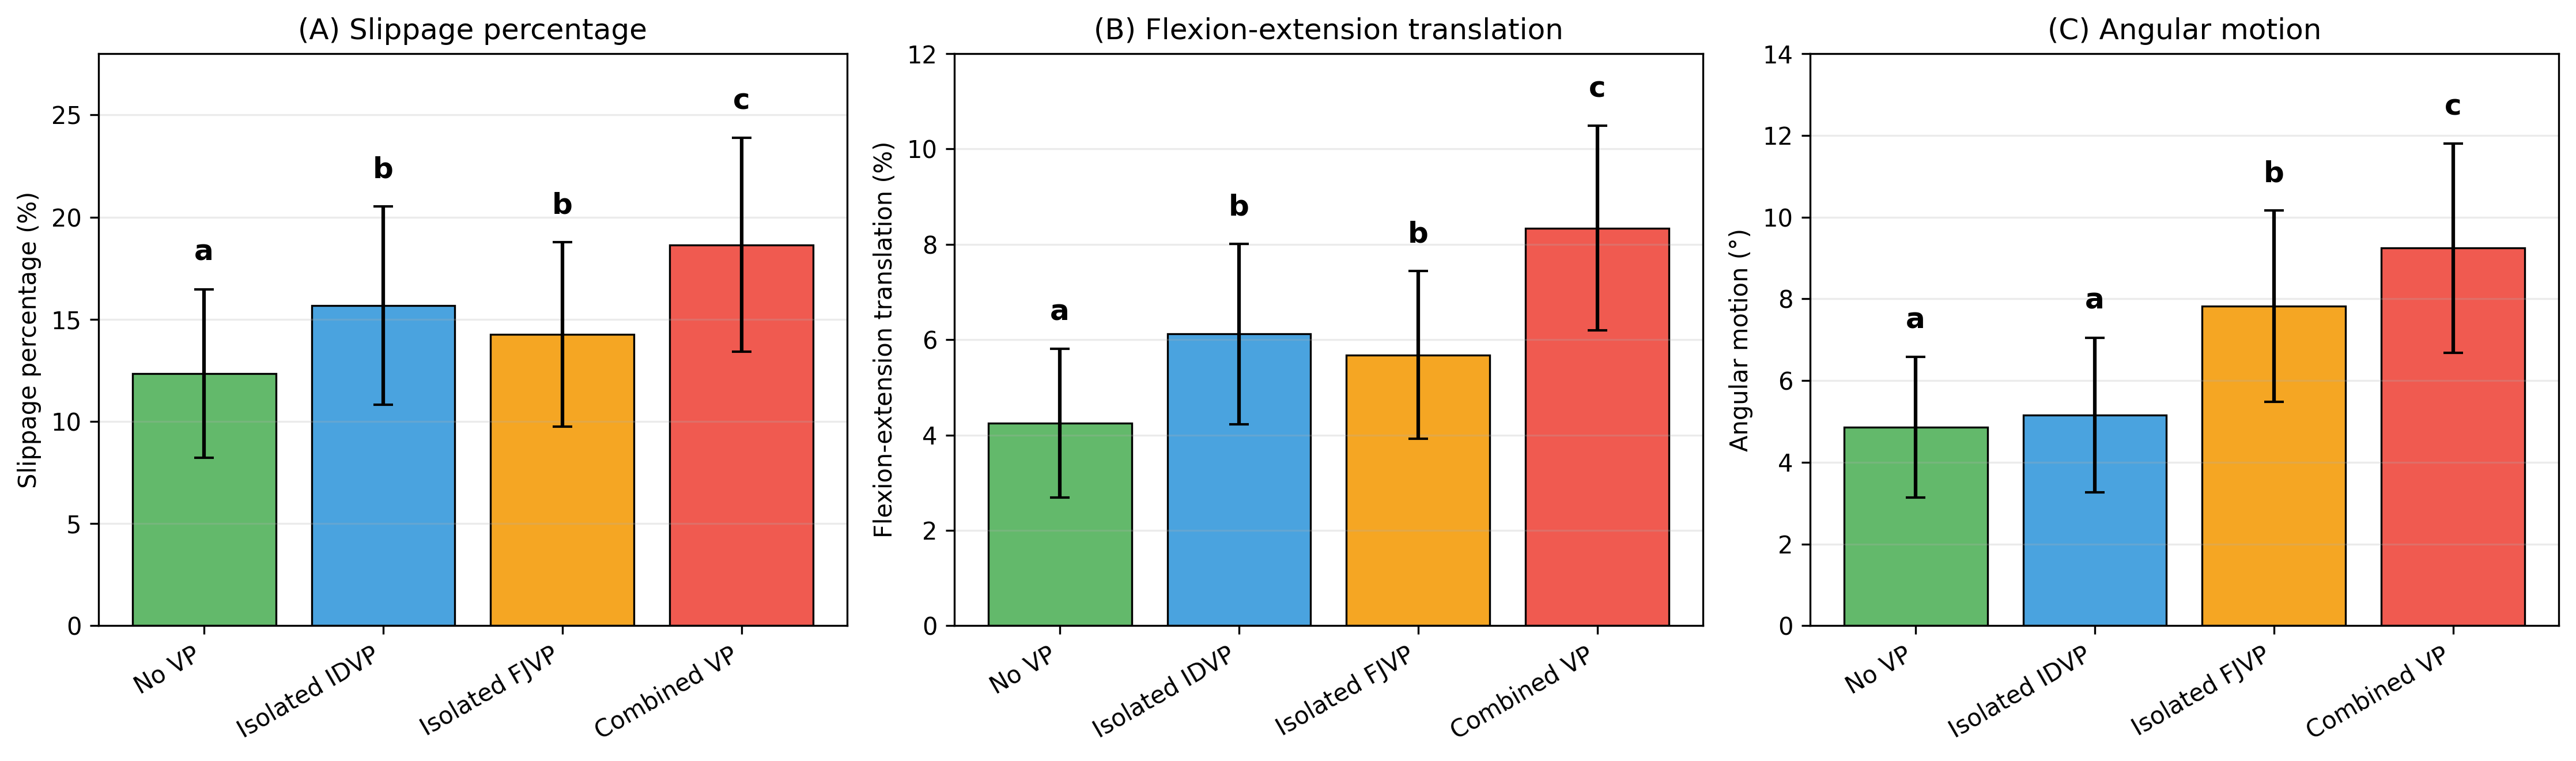


(A) Slippage percentage comparison. (B) Flexion-extension translation comparison. (C) Angular motion comparison, expressed in degrees. Error bars represent standard deviations. Bars sharing the same letter are not significantly different after Tukey/Bonferroni post hoc adjustment (adjusted P>0.05).

**Supplementary Table S1. Univariable logistic regression analyses for IDVP and FJVP.**

BMI, body mass index; BMD, bone mineral density; CI, confidence interval; FI, fatty infiltration; FJVP, facet joint vacuum phenomenon; IDVP, intradiscal vacuum phenomenon; OR, odds ratio; PI, pelvic incidence; PMI, psoas muscle index; rfCSA, relative functional cross-sectional area.

| **Variable** | **IDVP OR (95% CI)** | **IDVP P value** | **FJVP OR (95% CI)** | **FJVP P value** |
| --- | --- | --- | --- | --- |
| Age (per 5-year increase) | 1.189 (1.023-1.382) | 0.024 | 1.256 (1.078-1.463) | 0.003 |
| Female sex | 1.112 (0.723-1.712) | 0.628 | 1.098 (0.702-1.715) | 0.685 |
| BMI (per 1 kg/m² increase) | 1.089 (1.012-1.172) | 0.023 | 1.156 (1.072-1.247) | <0.001 |
| Disease duration (per 12 months) | 1.045 (0.978-1.117) | 0.189 | 1.034 (0.965-1.108) | 0.324 |
| BMD T-score (per 1 SD decrease) | 1.156 (0.923-1.447) | 0.206 | 1.123 (0.895-1.409) | 0.318 |
| Diabetes mellitus | 1.234 (0.689-2.212) | 0.478 | 1.256 (0.695-2.269) | 0.448 |
| Smoking history | 0.987 (0.578-1.685) | 0.962 | 1.123 (0.654-1.928) | 0.678 |
| Disc height (per 1 mm decrease) | 3.876 (2.654-5.662) | <0.001 | 1.567 (1.098-2.237) | 0.013 |
| Pfirrmann grade (per grade increase) | 2.567 (1.876-3.512) | <0.001 | 1.567 (1.145-2.143) | 0.005 |
| Facet degeneration grade (per grade increase) | 1.456 (1.123-1.889) | 0.005 | 3.245 (2.345-4.492) | <0.001 |
| Moderate/severe facet effusion | 1.678 (1.123-2.509) | 0.012 | 5.234 (3.721-7.362) | <0.001 |
| Slippage percentage (per 5% increase) | 1.876 (1.365-2.578) | <0.001 | 1.567 (1.134-2.165) | 0.006 |
| Flexion-extension translation (per 2% increase) | 1.567 (1.234-1.990) | <0.001 | 1.678 (1.312-2.147) | <0.001 |
| Angular motion (per 2° increase) | 1.567 (1.165-2.109) | 0.003 | 2.876 (2.056-4.023) | <0.001 |
| Multifidus rfCSA (per 0.1 decrease) | 1.567 (1.123-2.187) | 0.008 | 2.234 (1.587-3.147) | <0.001 |
| Multifidus FI (per 5% increase) | 1.456 (1.234-1.718) | <0.001 | 1.789 (1.456-2.198) | <0.001 |
| Goutallier grade (per grade increase) | 1.456 (1.165-1.820) | 0.001 | 1.876 (1.487-2.367) | <0.001 |
| PMI (per 1 cm²/m² decrease) | 1.123 (0.923-1.367) | 0.245 | 1.089 (0.892-1.329) | 0.412 |
| Ligamentum flavum thickness (per 1 mm increase) | 1.567 (1.165-2.109) | 0.003 | 1.876 (1.387-2.537) | <0.001 |
| Lumbar lordosis (per 5° decrease) | 1.123 (0.923-1.367) | 0.245 | 1.056 (0.867-1.287) | 0.578 |
| Pelvic incidence (per 5° increase) | 1.056 (0.876-1.273) | 0.567 | 1.034 (0.856-1.249) | 0.734 |
| PI-LL mismatch (per 5° increase) | 1.345 (1.098-1.648) | 0.005 | 1.234 (1.005-1.515) | 0.045 |
